# Supplementary material for: Thermodynamic origins of selective binding affinity between p-sulfonatocalix[4,5]arenes with biguanidiniums
Source: Royal Society of Chemistry journal article supplement (doi:10.1039/c2ob06313a), 2011-11-23
Supplement: c2ob06313a.pdf [file c2ob06313a.pdf]

**Supporting Information for:**

**Thermodynamic Origins of Selective Binding Affinity Between  
*p*-Sulfonatocalix[4,5]arenes with Biguanidiniums**

Dong-Sheng Guo, Hong-Qing Zhang, Fei Ding and Yu Liu\*

*Department of Chemistry, State Key Laboratory of Elemento-Organic Chemistry,  
Nankai University, Tianjin, 300071 (P.R. China)*

E-mail: [yuliu@nankai.edu.cn](mailto:yuliu@nankai.edu.cn)

**TABLE S1:** The chemical shift change  $\Delta\delta$  values (ppm) of MFM in the presence of SC4A or SC5A in aqueous solution (pD 2.0 and 7.2).

| pD  | Hosts | H(-CH <sub>3</sub> ) |
|-----|-------|----------------------|
| 7.2 | SC4A  | -2.19                |
|     | SC5A  | -1.67                |
| 2.0 | SC4A  | -1.91, -2.14         |
|     | SC5A  | -1.71, -1.88         |

**TABLE S2:** The chemical shift change  $\Delta\delta$  values (ppm) of PFM in the presence of SC4A or SC5A in aqueous solution (pD 2.0 and 7.2).

| pD  | Hosts | H <sub>a</sub> | H <sub>b</sub> | H <sub>c</sub> | H <sub>d</sub> | H <sub>e</sub> |
|-----|-------|----------------|----------------|----------------|----------------|----------------|
| 7.2 | SC4A  | -1.54          | -1.24          | -0.94          | -0.94          | -0.79          |
|     | SC5A  | -1.20          | -1.17          | -1.50          | -1.41          | -1.25          |
| 2.0 | SC4A  | -2.10          | -1.64          | -1.09          | -0.86          | -0.62          |
|     | SC5A  | -1.12          | -1.09          | -1.25          | -1.13          | -0.69          |

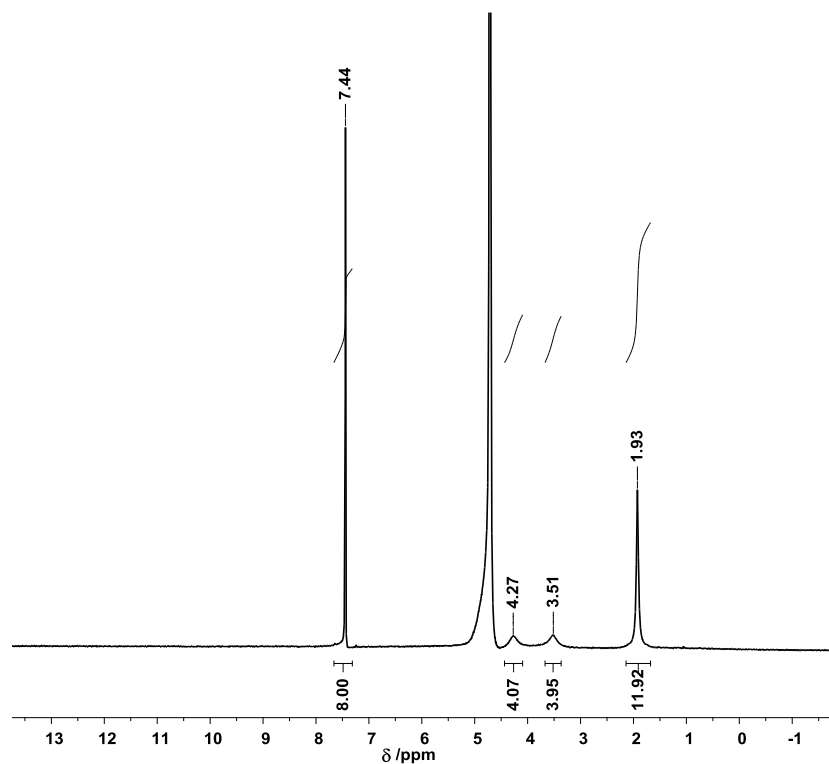

**FIGURE S1.** The <sup>1</sup>H NMR spectrum of single-crystal complex MFM-SC4A in D<sub>2</sub>O

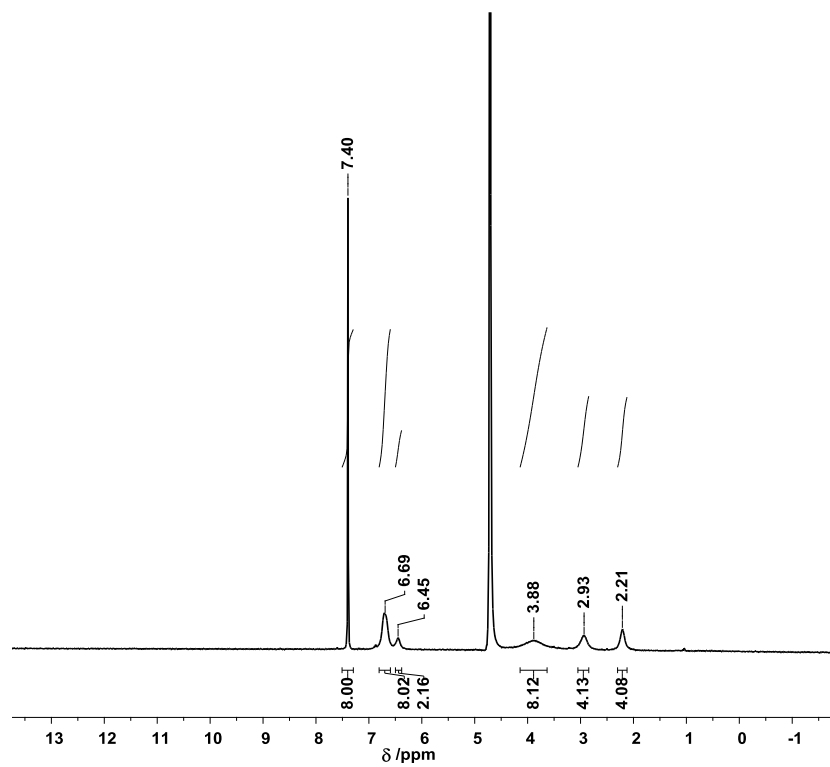

**FIGURE S2.** The <sup>1</sup>H NMR spectrum of single-crystal complex PFM-SC4A in D<sub>2</sub>O

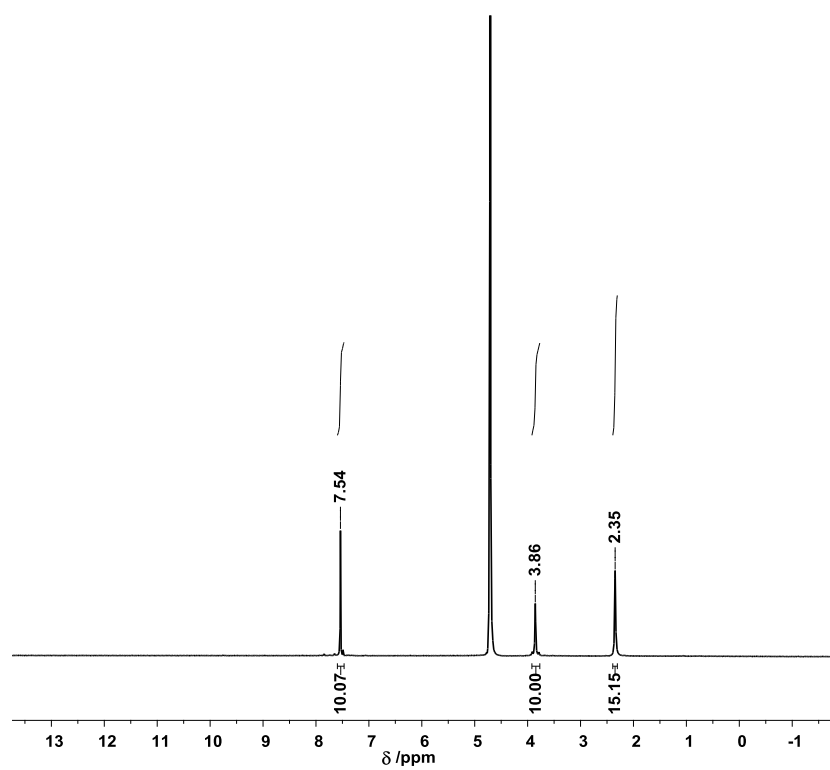

**FIGURE S3.** The <sup>1</sup>H NMR spectrum of single-crystal complex MFM-SC5A in D<sub>2</sub>O

In complex MFM $\subset$ SC4A, there is another kind of complex we have not discussed. It shows that MFM is immerse into the cavity of SC4A in a more perpendicular orientation *via* one N–H $\cdots\pi$  interaction (N4–H4 $\cdots$ ring of C15–20, 3.215(1) Å, 176.6(3) $^\circ$ ) and two C–H $\cdots\pi$  interactions (C59–H59 $\cdots$ ring of C8–13, 2.539(1) Å, 141.5(4) $^\circ$ ; C60–H60 $\cdots$ ring of C1–6, 3.340(1) Å, 116.1(5) $^\circ$ ), while the positive guanidinium group is fixed at the upper-rim of SC4A, captured by one sulfonate group through one unconventional hydrogen bond (N1 $\cdots$ O8, 2.786(7)Å, 163.3(4) $^\circ$ ) (Figure S4). It also shows the SC4A cone structure is pinched to give a  $C_{2v}$  symmetry with sulfur distances of 11.447(3)Å and 8.366(3)Å for oppositely oriented sulfonate groups. Moreover, the actual  $\varphi$  and  $\chi$  torsion angle values are 103.0(7),  $-82.6(8)$ ; 75.6(7),  $-91.8(7)$ ; 96.2(7),  $-78.2(7)$ ; 74.7(8),  $-98.7(1)$ .

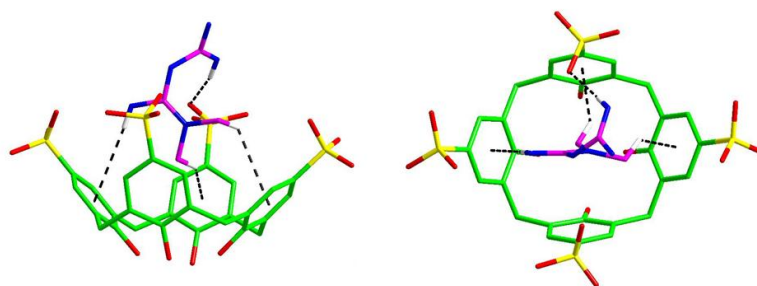

**FIGURE S4.** Solid-state inclusion structure of MFM $\subset$ SC4A. The broken lines represent the intermolecular hydrogen bonds, the C–H $\cdots\pi$  interactions, or the N–H $\cdots\pi$  interactions between host and guest.
